# Supplementary material for: Human total, basal and activity energy expenditures are independent of ambient environmental temperature
Source: PubMed Central journal article supplement — iScience. 2022 Jun 28;25(8):104682. doi: 10.1016/j.isci.2022.104682 (PMC9294192; doi:10.1016/j.isci.2022.104682), 2022-06-28
Supplement: mmc1.pdf [file mmc1.pdf]

## **Supplemental information**

### **Human total, basal and activity energy expenditures are independent of ambient environmental temperature**

**Xueying Zhang, Yosuke Yamada, Hiroyuki Sagayama, Philip N. Ainslie, Ellen E. Blaak, Maciej S. Buchowski, Graeme L. Close, Jamie A. Cooper, Sai Krupa Das, Lara R. Dugas, Michael Gurven, Asmaa El Hamdouchi, Sumei Hu, Noorjehan Joonas, Peter Katzmarzyk, William E. Kraus, Robert F. Kushner, William R. Leonard, Corby K. Martin, Erwin P. Meijer, Marian L. Neuhouser, Robert M. Ojiambo, Yannis P. Pitsiladis, Guy Plasqui, Ross L. Prentice, Susan B. Racette, Eric Ravussin, Leanne M. Redman, Rebecca M. Reynolds, Susan B. Roberts, Luis B. Sardinha, Analiza M. Silva, Eric Stice, Samuel S. Urlacher, Edgar A. Van Mil, Brian M. Wood, Alexia J. Murphy-Alford, Cornelia Loechl, Amy H. Luke, Jennifer Rood, Dale A. Schoeller, Klaas R. Westerterp, William W. Wong, Herman Pontzer, John R. Speakman, and the IAEA DLW database consortium**

1  
2  
3  
4  
5  
6  
7  
8  
9  
10  
11  
12  
13  
14  
15  
16  
17  
18  
19  
20  
21  
22  
23  
24  
25  
26  
27  
28  
29  
30  
31  
32  
33  
34  
35  
36  
37

## Supplementary Materials for

Human total, basal and activity energy expenditures are independent of ambient temperature.

Xueying Zhang, Yosuke Yamada†, Hiroyuki Sagayama†, Philip N. Ainslie, Ellen E. Blaak, Maciej S. Buchowski, Graeme L. Close, Jamie A. Cooper, Sai Krupa Das, Lara R. Dugas, Michael Gurven, Asmaa El Hamdouchi, Sumei Hu, Noorjehan Joonas, Peter Katzmarzyk, William E. Kraus, Robert F. Kushner, William R. Leonard, Corby Martin, Erwin P. Meijer, Marian L. Neuhouser, Robert M. Ojiambo, Yannis P. Pitsiladis, Guy Plasqui, Ross L. Prentice, Susan B. Racette, Eric Ravussin, Leanne M. Redman, Rebecca M. Reynolds, Susan B. Roberts, Luis B. Sardinha, Analiza M. Silva, Eric Stice, Samuel S. Urlacher, Edgar A. Van Mil, Brian M. Wood, Alexia J. Murphy-Alford, Cornelia Loechl, Amy H Luke†, Jennifer Rood†, Dale A. Schoeller†, Klaas R. Westerterp†, William W. Wong†, Herman Pontzer†, John R. Speakman\* and the IAEA DLW database consortium#.

\*lead corresponding author

†co-corresponding author

# see supplementary materials

Correspondence to: [j.speakman@abdn.ac.uk](mailto:j.speakman@abdn.ac.uk)

**This PDF file includes:**

Figure S1 to S3

38 **Figure S1**

39

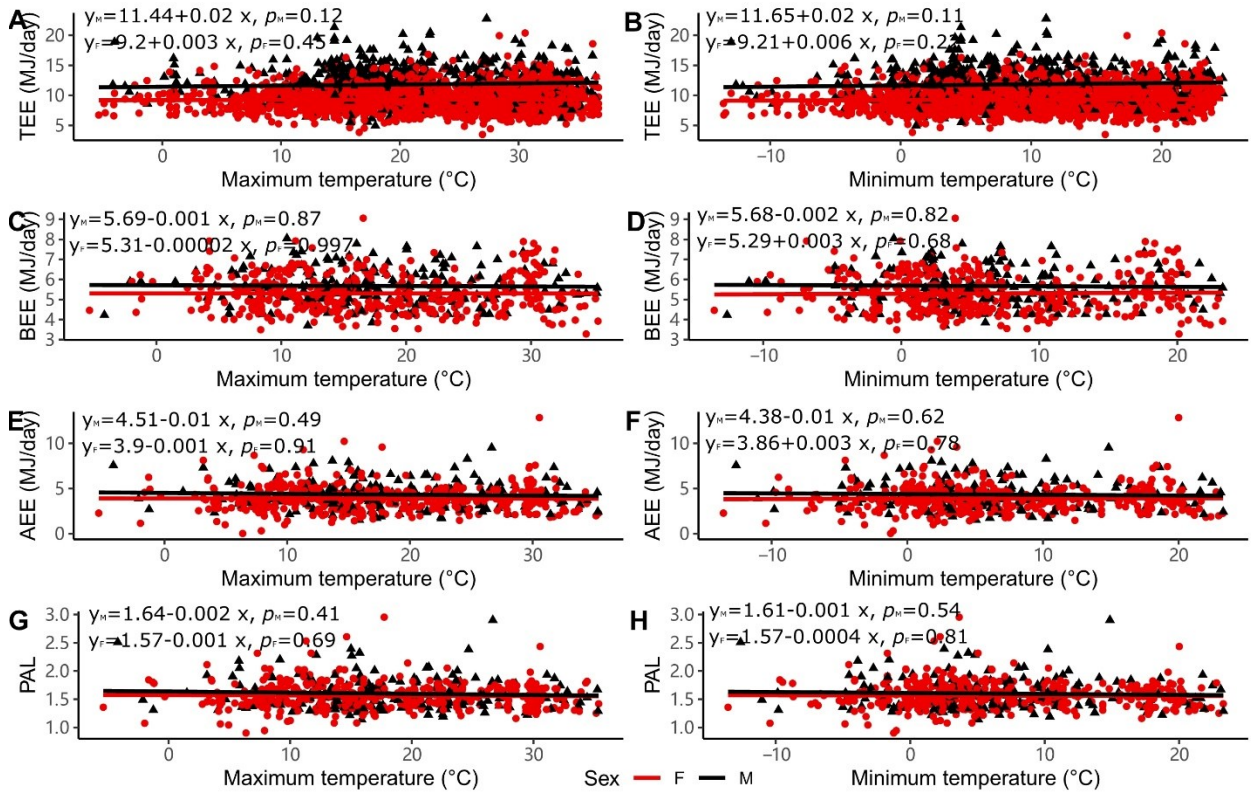

40  
41

42 **Figure S1.** Associations between unadjusted total, basal, activity energy expenditure, physical  
 43 activity levels and ambient temperature. A maximum and B minimum temperature (°C) vs TEE  
 44 (MJ/day). C maximum and D minimum temperature (°C) vs BEE (MJ/day). E maximum and F  
 45 minimum temperature (°C) vs AEE (MJ/day). G maximum and H minimum temperature (°C) vs  
 46 PAL. Each data point is a different individual. The black lines are the least squares fitted  
 47 regression lines for males and the red lines are for females. Related to Figure 1.

48

49 **Figure S2**

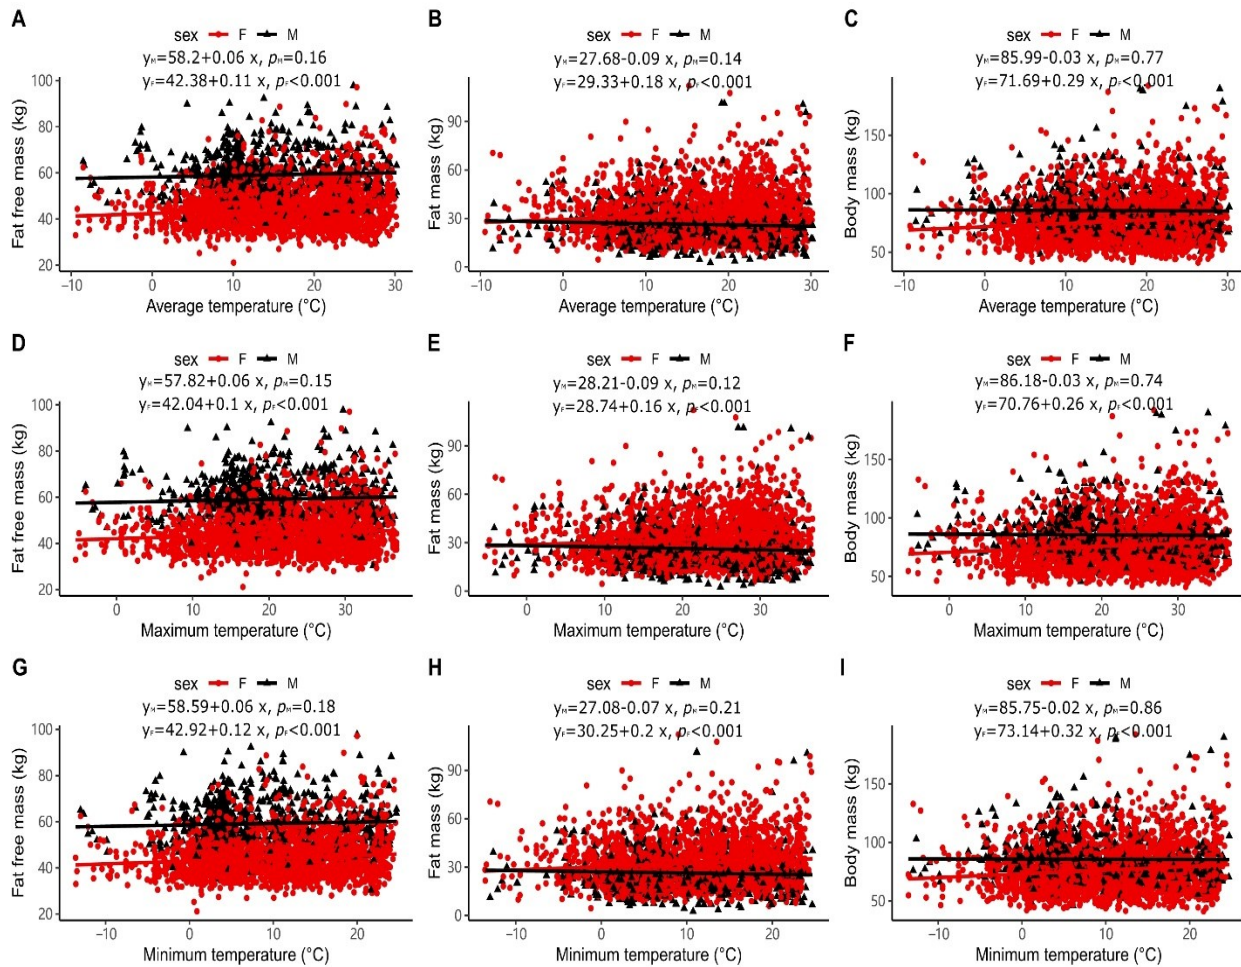

50

51 **Figure S2** Associations between all the traits and ambient temperature. A fat free mass (kg) vs  
 52 TAVG (°C). B fat mass (kg) vs TAVG (°C). C body mass (kg) vs TAVG (°C). D fat free mass  
 53 (kg) vs TMAX (°C). E fat mass vs TMAX (°C). F body mass (kg) vs TMAX (°C). G fat free mass  
 54 (kg) vs TMIN (°C). H fat mass (kg) vs TMIN (°C). I body mass (kg) vs TMIN (°C). Each data  
 55 point is a different measurement of the trait. The black lines are the least squares fitted regression  
 56 lines for males and the red lines are for females. Related to Figure 2.

57

**Figure S3**

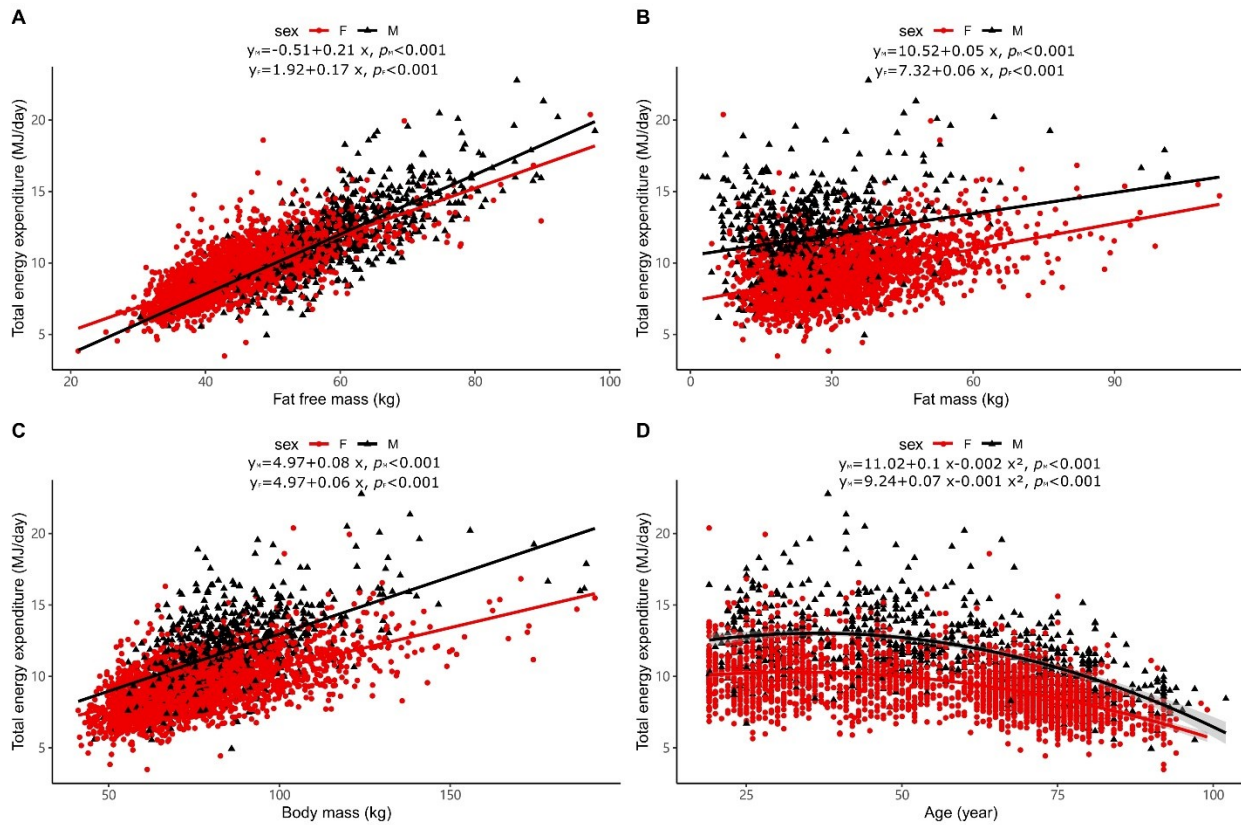

**Figure S3** Associations between unadjusted total energy expenditure with A fat free mass (kg). B fat mass (kg). C body mass (kg). D age (year). All expenditures are in MJ/day and each data point is a different measurement of expenditure. The black lines are the least squares fitted regression lines for males and the red lines are for females. Related to Figure 2.
